# Supplementary material for: Busulfan in Infant to Adult Hematopoietic Cell Transplant Recipients: A Population Pharmacokinetic Model for Initial and Bayesian Dose Personalization
Source: Oxford University Press journal article supplement (doi:10.1158/1078-0432.ccr-13-1960), 2013-11-11
Supplement: 10780432ccr131960-sup-table_s3.pdf [file 10780432ccr131960-sup-table_s3.pdf]

**Supplemental Table 3.** Acknowledgement of the institutions who used the FHCRC (1999-2001) or the SCCA Busulfan Pharmacokinetics Laboratory (2002-2011)

|                                            |                                              |
|--------------------------------------------|----------------------------------------------|
| Akron Children's Hospital                  | Lucile Packard Children's Hospital           |
| All Children's Hospital                    | Mattel Children's Hospital UCLA              |
| American Family Children's Hospital        | Medical City Children's Hospital             |
| Blair E. Batson Children's Hospital        | Medical University of South Carolina         |
| British Columbia Children's Hospital       | Children's Hospital                          |
| Cardinal Glennon Children's Medical Center | Memorial Sloan-Kettering Cancer Center       |
| Children's Hospital and Medical Center     | Monroe Carell Jr. Children's Hospital at     |
| Children's Hospital and Research Center    | Vanderbilt                                   |
| Children's Hospital of Alabama             | Nationwide Children's Hospital               |
| Children's Hospital of Orange County       | North Carolina Children's Hospital           |
| Children's Hospital of Pittsburgh          | Penn State Hershey Children's Hospital       |
| Children's Hospital of Richmond            | Phoenix Children's Hospital                  |
| Children's Hospital of Wisconsin           | Presbyterian/St. Luke's Medical Center       |
| Children's Hospital                        | Primary Children's Medical Center            |
| Children's Medical Center                  | Rady Children's Hospital                     |
| Children's Memorial Hospital               | Riley Hospital for Children                  |
| Children's Mercy Hospital                  | Seattle Children's Hospital                  |
| Children's National Medical Center         | St. Louis Children's Hospital                |
| Cincinnati Children's Hospital Medical     | Steven and Alexandra Cohen Children's        |
| Center                                     | Medical Center                               |
| Cook Children's Medical Center             | Texas Transplant Institute/Methodist         |
| Doernbecher Children's Hospital            | Children's Hospital                          |
| Floating Hospital for Children at Tufts    | The Bristol-Myers-Squibb Children's          |
| Medical Center                             | Hospital                                     |
| Health Sciences Centre                     | The Children's Hospital at Montefiore        |
| Helen DeVos Children's Hospital            | The Children's Hospital                      |
| Kapi'olani Medical Center                  | The Joseph M. Sanzari Children's Hospital    |
| Levine Children's Hospital at Carolinas    | University of Michigan C. S. Mott Children's |
| Medical Center                             | Hospital                                     |
| Loma Linda University Children's Hospital  | Yale New Haven Children's Hospital           |
